# Supplementary material for: Predictors of mortality in autoimmune disease patients with concurrent cytomegalovirus infections detected by quantitative real-time PCR
Source: PLoS One. 2017 Jul 25;12(7):e0181590. doi: 10.1371/journal.pone.0181590 (PMC5526501; doi:10.1371/journal.pone.0181590)
Supplement: S1 File — (XLSX) [file pone.0181590.s001.xlsx]

## Sheet: Sheet2
outcome	CMV-Expire (Day)	CMV count
0	90	1410
0	90	7300
0	90	2330
0	90	3540
0	90	1065000
0	90	98500
0	90	5000
0	90	5000
0	90	60000
0	90	5000
0	90	6700
0	90	5000
0	90	6900
0	90	60000
0	90	14350
0	90	5000
0	90	4380
0	90	5000
0	90	51000
0	90	2765
0	90	124000
0	90	10850
0	90	500
0	90	7800
0	90	58000
0	90	7650
0	90	12050
0	90	293
0	90	40950
0	90	58000
0	90	5000
0	90	147000
0	90	12950
0	90	5000
0	90	5000
0	90	3995
0	90	225500
0	90	30700
0	90	39750
0	90	5700
0	90	840000
0	90	1885
0	90	1240
0	90	3995
0	90	23750
0	90	2520
0	90	1235
1	3	1060
1	16	208000
1	12	315000
1	7	4005
1	6	625000
1	17	10500
1	9	5350
1	41	1330000
1	7	98000
1	22	5000
1	53	186000
1	2	5150
1	12	93000
1	32	1250000
1	21	5000
1	16	11750
1	73	3755000
1	31	165000
1	7	23050
1	27	478000
1	14	103000
1	28	3895
1	7	109000
1	27	4000
1	13	755000
1	22	15200
